# Supplementary material for: Dissecting the chiral recognition of TLR4/MD2 with Neoseptin-3 enantiomers by molecular dynamics simulations
Source: Royal Society of Chemistry journal article supplement (doi:10.1039/d3cp06124h), 2024-01-01
Supplement: d3cp06124h1.pdf [file d3cp06124h1.pdf]

**Dissecting the chiral recognition of TLR4/MD2 with Neoseptin-3 enantiomers by molecular dynamics simulations**

Cong Zhang<sup>1,2</sup>, Siru Wu<sup>1,2</sup>, Mingqi Li<sup>1,2</sup>, Penghui Li<sup>3</sup>, Xiubo Du<sup>3</sup>, Yibo Wang<sup>1\*</sup>, Xiaohui Wang<sup>1,2,4\*</sup>

<sup>1</sup>Laboratory of Chemical Biology, Changchun Institute of Applied Chemistry, Chinese Academy of Sciences, Changchun, 130022, China

<sup>2</sup>School of Applied Chemistry and Engineering, University of Science and Technology of China, Hefei, 230026, China

<sup>3</sup>Shenzhen Key Laboratory of Marine Biotechnology and Ecology, College of Life Sciences and Oceanography, Shenzhen University, Shenzhen, 518060, China

<sup>4</sup>Beijing National Laboratory for Molecular Sciences, Beijing, 100190, China

\*Corresponding authors: Yibo Wang (yibo.wang@ciac.ac.cn); Xiaohui Wang ([xiaohui.wang@ciac.ac.cn](mailto:xiaohui.wang@ciac.ac.cn))

## Supporting Information

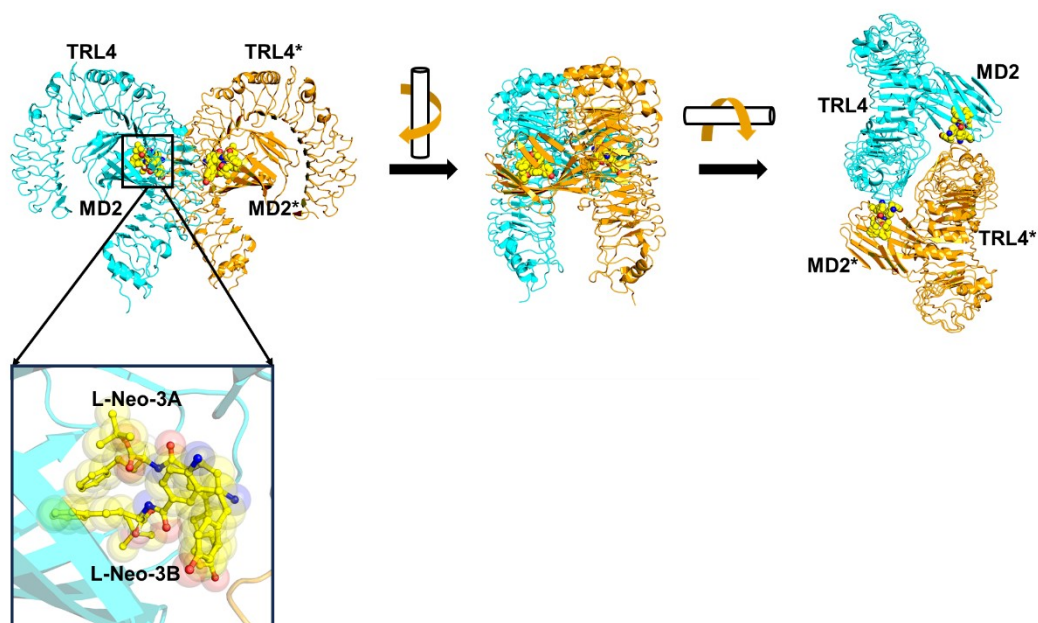

**Figure S1.** Structural details of the  $(2^*Neo-3/TLR4/MD2)_2$  complexes. TLR4/MD2 and TRL4\*/MD2\* proteins are represented with cartoons and colored cyan and bright orange respectively. Neo-3 is represented with yellow sticks and spheres (taking L-Neo-3 as an example).

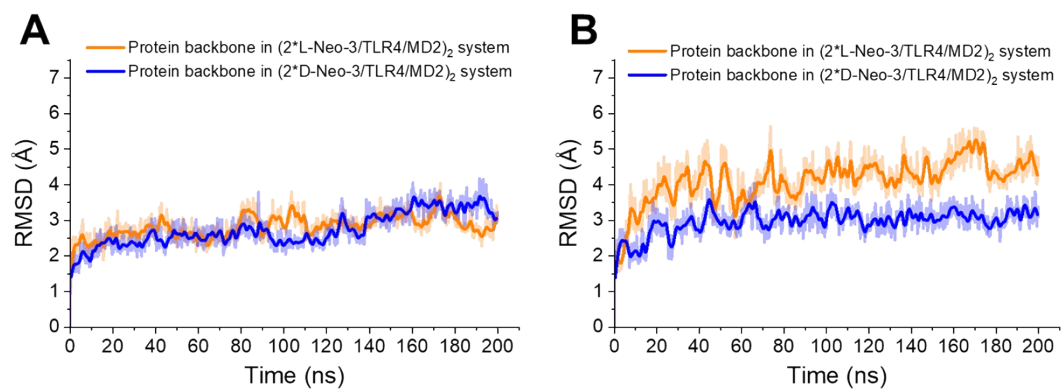

**Figure S2.** RMSDs of the protein backbone atoms in the second **(A)** and third **(B)** independent repeated simulations of  $(2^*L\text{-Neo-3/TLR4/MD2})_2$  and  $(2^*D\text{-Neo-3/TLR4/MD2})_2$  systems.

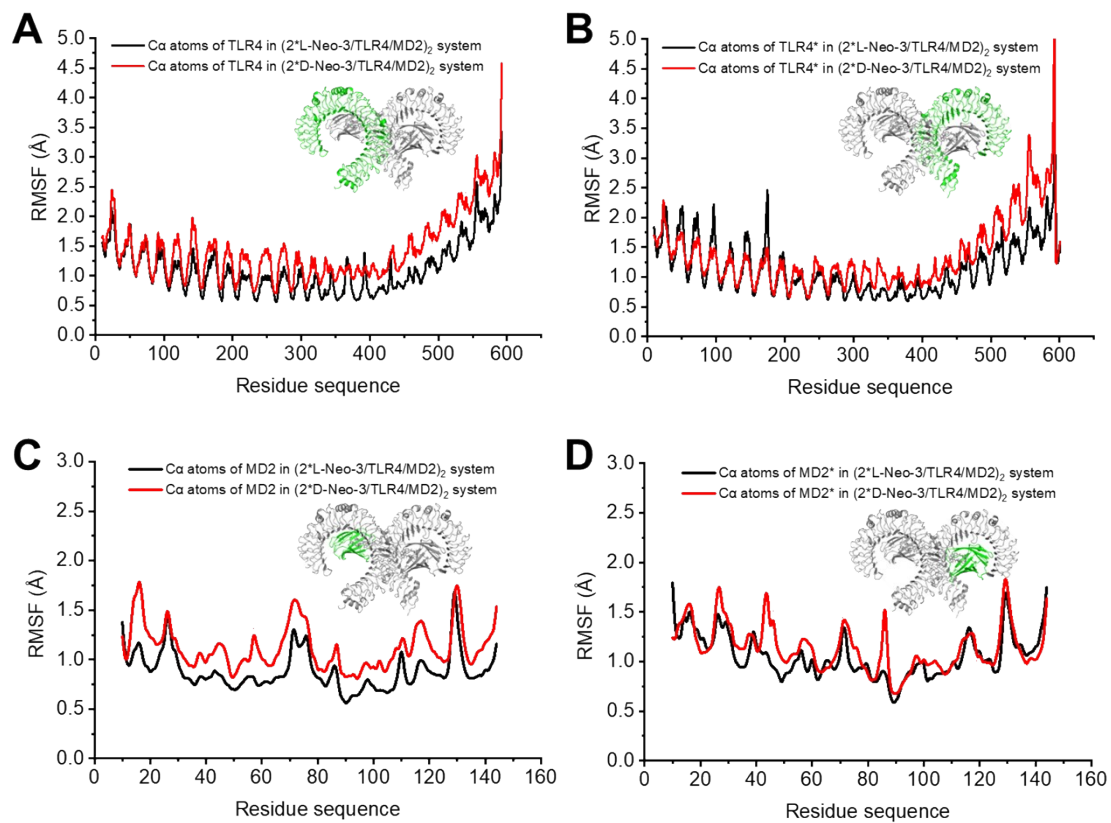

**Figure S3.** RMSFs of the  $\text{Ca}$  atoms of TLR4 (A), TLR4\* (B), MD2 (C), and MD2\* (D) during the last 80 ns trajectories in the simulation of  $(2^*L\text{-Neo-3/TLR4/MD2})_2$  and  $(2^*D\text{-Neo-3/TLR4/MD2})_2$  systems.

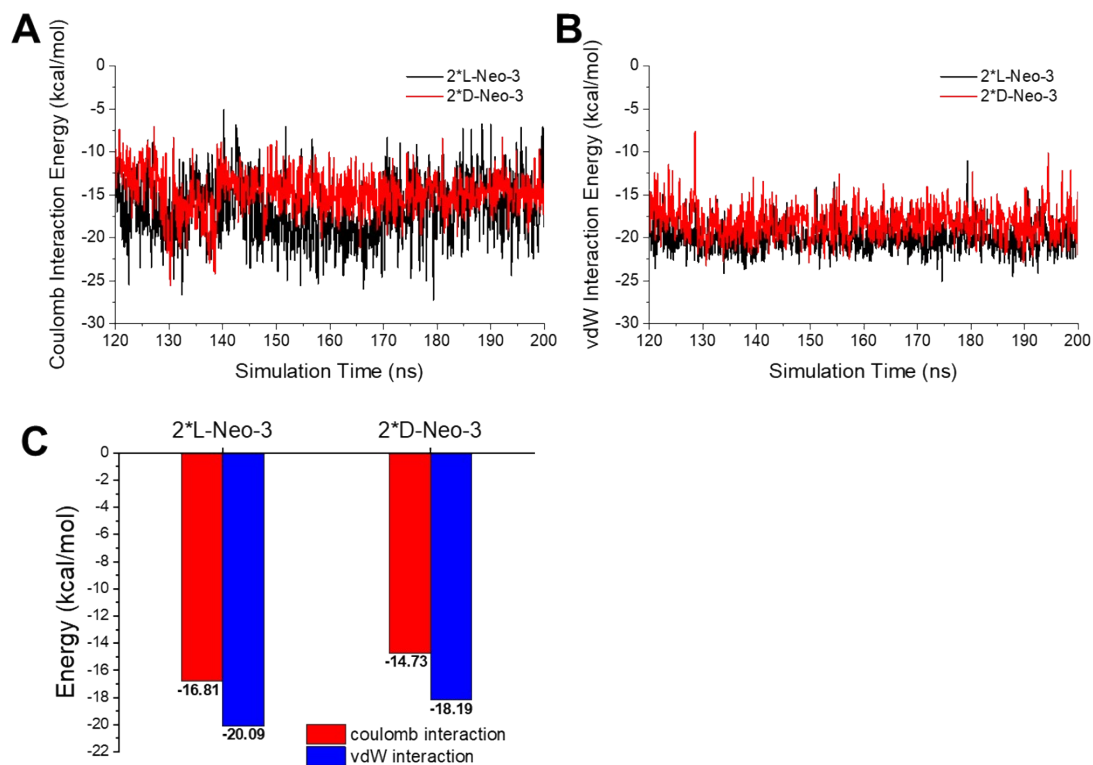

**Figure S4.** (A, B) Changes in Coulomb interaction energy (A) and van der Waals (vdW) interaction energy (B) between two L-Neo-3 or two D-Neo-3 molecules within the cavity of MD2 during the last 80 ns of MD trajectories; (C) The average Coulomb interaction energy (red) and vdW interaction energy (blue) between two L-Neo-3 or two D-Neo-3 molecules within the cavity of MD2 over the last 80 ns of MD trajectories.

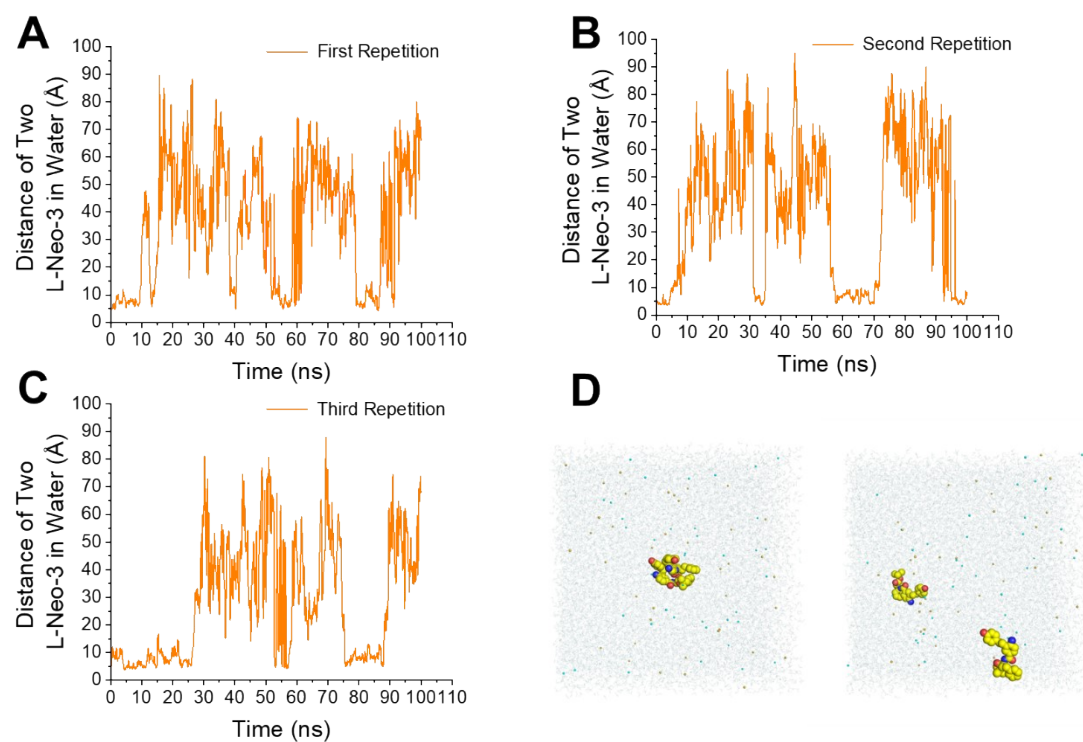

**Figure S5.** (A-C) Time evolution of distance between two L-Neo-3 molecules in three independent repeated simulations; (D) The relative position of two L-Neo-3 at the beginning (left) and ending (right) in the first simulation.

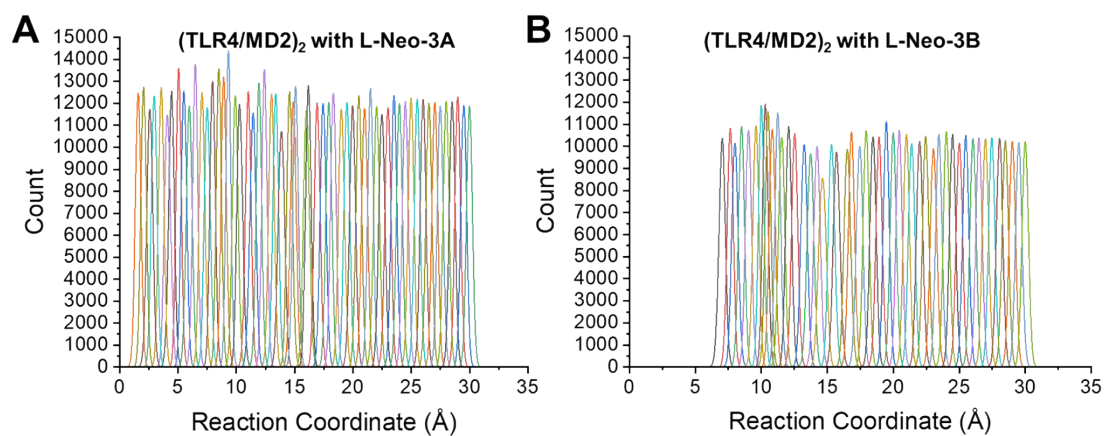

**Figure S6.** Histogram analysis of the overlap between umbrella windows along the reaction coordinates of L-Neo-3A(**A**) and L-Neo-3B(**B**) binding to TLR4/MD2. Each window consistently overlaps with its neighboring windows.

**Table S1.** RESP charges of all atoms of L-Neo-3 and D-Neo-3 molecules. ( $e = 1.602176 \times 10^{-19}$  C).

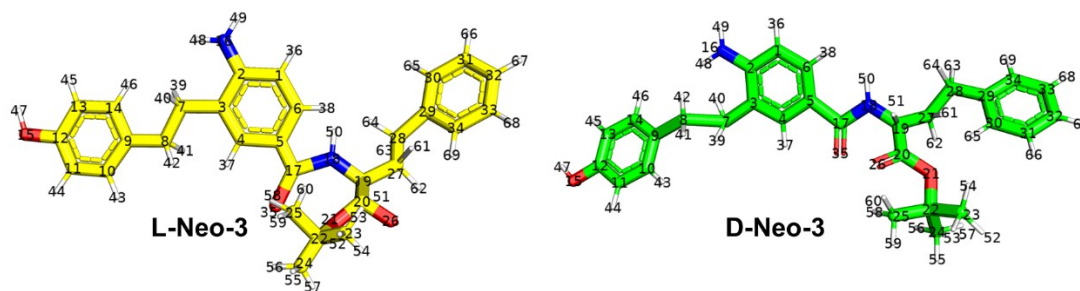

| Atom index | Atom type | L-Neo-3 RESP charge (e) | D-Neo-3 RESP charge (e) | Atom index | Atom type | L-Neo-3 RESP charge (e) | D-Neo-3 RESP charge (e) |
|------------|-----------|-------------------------|-------------------------|------------|-----------|-------------------------|-------------------------|
| 1          | C         | -0.253542               | -0.23047                | 36         | H         | 0.139383                | 0.132874                |
| 2          | C         | 0.376439                | 0.405284                | 37         | H         | 0.142317                | 0.152758                |
| 3          | C         | 0.025192                | 0.048769                | 38         | H         | 0.128338                | 0.153559                |
| 4          | C         | -0.25267                | -0.235421               | 39         | H         | 0.020216                | 0.04282                 |
| 5          | C         | 0.029439                | -0.04222                | 40         | H         | 0.020216                | 0.04282                 |
| 6          | C         | -0.212705               | -0.248908               | 41         | H         | 0.067573                | 0.061056                |
| 7          | C         | 0.123748                | -0.048803               | 42         | H         | 0.067573                | 0.061056                |
| 8          | C         | -0.176916               | -0.042412               | 43         | H         | 0.146684                | 0.141066                |
| 9          | C         | 0.159446                | 0.090866                | 44         | H         | 0.152252                | 0.150045                |
| 10         | C         | -0.250805               | -0.221753               | 45         | H         | 0.152252                | 0.150045                |
| 11         | C         | -0.204099               | -0.206394               | 46         | H         | 0.146684                | 0.141066                |
| 12         | C         | 0.362112                | 0.367569                | 47         | H         | 0.368103                | 0.375482                |
| 13         | C         | -0.204099               | -0.206394               | 48         | H         | 0.386652                | 0.402695                |
| 14         | C         | -0.250805               | -0.221753               | 49         | H         | 0.376652                | 0.352695                |
| 15         | O         | -0.581886               | -0.592086               | 50         | H         | 0.313926                | 0.300725                |
| 16         | N         | -0.915712               | -0.981363               | 51         | H         | 0.160165                | 0.178078                |
| 17         | C         | 0.634421                | 0.7044                  | 52         | H         | 0.03283                 | 0.112679                |
| 18         | N         | -0.864813               | -0.687066               | 53         | H         | 0.03283                 | 0.112679                |
| 19         | C         | 0.392859                | 0.120197                | 54         | H         | 0.03283                 | 0.112679                |
| 20         | C         | 0.292193                | 0.652868                | 55         | H         | 0.03283                 | 0.112679                |
| 21         | O         | -0.473368               | -0.625392               | 56         | H         | 0.03283                 | 0.112679                |
| 22         | C         | 0.998173                | 0.956254                | 57         | H         | 0.03283                 | 0.112679                |
| 23         | C         | -0.295653               | -0.519383               | 58         | H         | 0.03283                 | 0.112679                |
| 24         | C         | -0.295653               | -0.519383               | 59         | H         | 0.03283                 | 0.112679                |
| 25         | C         | -0.295653               | -0.519383               | 60         | H         | 0.03283                 | 0.112679                |
| 26         | O         | -0.380974               | -0.541226               | 61         | H         | 0.000455                | -0.096873               |
| 27         | C         | 0.082506                | 0.421155                | 62         | H         | 0.000455                | -0.096873               |
| 28         | C         | -0.089115               | -0.108226               | 63         | H         | -0.006231               | 0.013829                |
| 29         | C         | 0.10885                 | 0.050153                | 64         | H         | -0.006231               | 0.013829                |
| 30         | C         | -0.145715               | -0.143113               | 65         | H         | 0.112335                | 0.117475                |
| 31         | C         | -0.151992               | -0.133848               | 66         | H         | 0.116916                | 0.115157                |
| 32         | C         | -0.093748               | -0.093547               | 67         | H         | 0.103083                | 0.105441                |
| 33         | C         | -0.151992               | -0.133848               | 68         | H         | 0.116916                | 0.115157                |
| 34         | C         | -0.145715               | -0.143113               | 69         | H         | 0.112335                | 0.117475                |
| 35         | O         | -0.532239               | -0.629581               |            |           |                         |                         |
